# Supplementary material for: Transparent and conducting ITO thin films by spin coating of an aqueous precursor solution
Source: Royal Society of Chemistry journal article supplement (doi:10.1039/c2jm32000b), 2012-01-01
Supplement: c2jm32000b.pdf [file c2jm32000b.pdf]

## Supplementary Information

# Transparent and conducting ITO thin films by spin coating of an aqueous precursor solution

Tor Olav Løveng Sunde,<sup>a</sup> Edita Garskaite,<sup>a</sup> Benjamin Otter,<sup>a</sup> Helle Ervik Fossheim,<sup>a</sup> Ragnhild Sæterli,<sup>b</sup> Randi Holmestad,<sup>b</sup> Mari-Ann Einarsrud<sup>a</sup> and Tor Grande<sup>\*a</sup>

<sup>a</sup>Department of Materials Science and Engineering, Norwegian University of Science and Technology, N-7491 Trondheim, Norway. E-mail:

<sup>10</sup> [grande@ntnu.no](mailto:grande@ntnu.no)

<sup>b</sup>Department of Physics, Norwegian University of Science and Technology, N-7491 Trondheim, Norway.

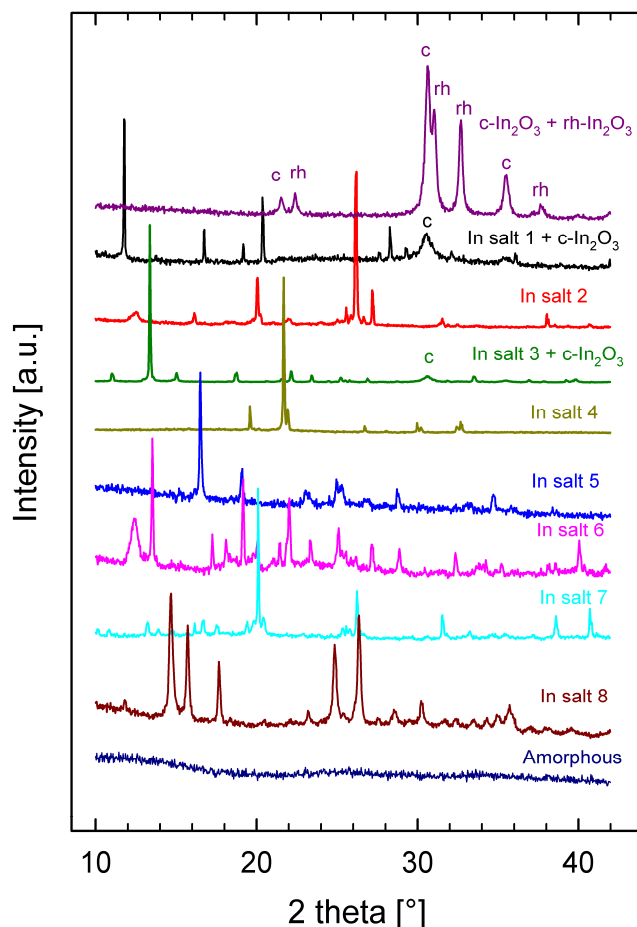

**Fig. S1** XRD of as-evaporated gels and powders calcinated at 400 °C after syntheses with different complexing agents. All the experiments were carried out with an initial cation concentration of 0.5 M. The diffraction lines from cubic  $\text{In}_2\text{O}_3$  (space group  $\text{Ia}\bar{3}$ ) and rhombohedral  $\text{In}_2\text{O}_3$  (space group  $\text{R}\bar{3}\text{c}$ ) are marked with *c* and *rh* respectively.

A series of experiments were carried out where the organic components in the recipe were alternated, all of which with an initial cation concentration of 0.5 M. The results from these experiments are summarized in Table 2. In most of the cases either precipitation of In salts or  $\text{In}_2\text{O}_3$  occurred during drying or before a gel was formed. It was confirmed by XRD that none of the salts were nitrates or acetates, and that the same salt was observed in syntheses both with and without tin. It is therefore believed that the salts are organometallic salts of indium and the respective organic additive, however, no further characterization was carried out. The salts are labelled In salt X according to their appearance in Table 2.
